# Supplementary material
Source: MDPI journal article supplement (https://www.mdpi.com/2071-1050/12/22/9574)

# List of materials

## House for the larvae

### 1. Medium density fiberboard (MDF)

- Two boards each 650 x 500 x 4 mm

### 2. Bucket with lid

- Volume: 5.5 liter standard size (oval!)

### 3. Plastic plate (Polystyrene) for the ramp within the bucket

- Thickness: 1 mm for flexibility and to fit it into the bucket

### 4. Precision scale

- Capacity: 200 g, resolution: 0.01 g

### 5. Drainage container to collect excess fluids

- Maximal  $\varnothing$  = 45 mm

### 6. Paper cup to collect the migrating larvae

- Volume 200 ml and  $\varnothing$  = 80 mm

### OPTIONAL:

#### A. Neodym magnets to attach the drainage flap

- Four pieces, ( $\varnothing$  = 10 mm, h = 2 mm)

#### B. Clay pots

- for small plants on the house ( $\varnothing$  = 40 mm)

#### C. Tweezers

#### D. Disposable gloves

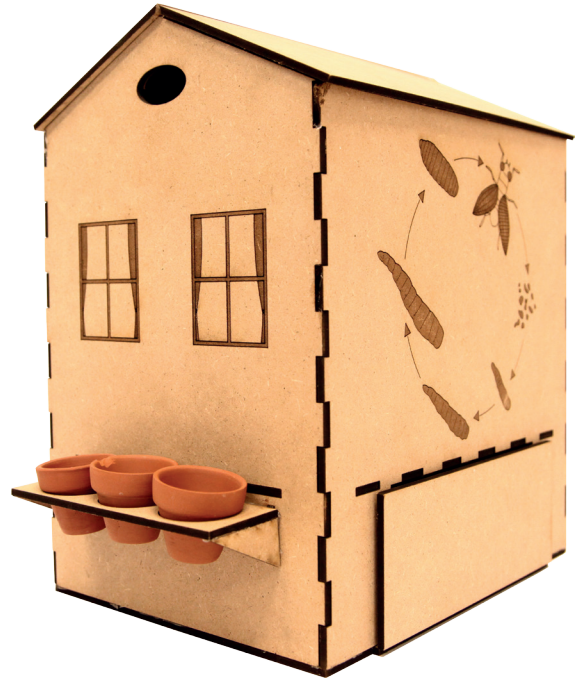

# Assembly instructions

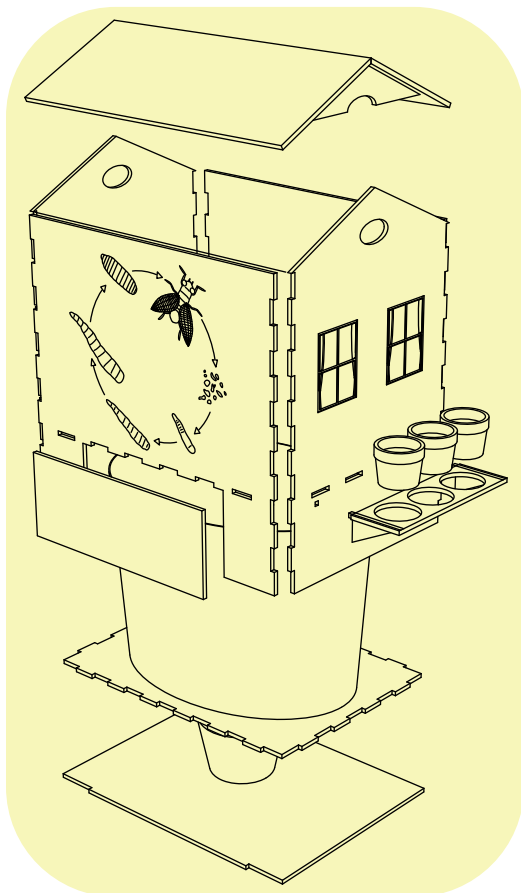

Setup house for the larvae

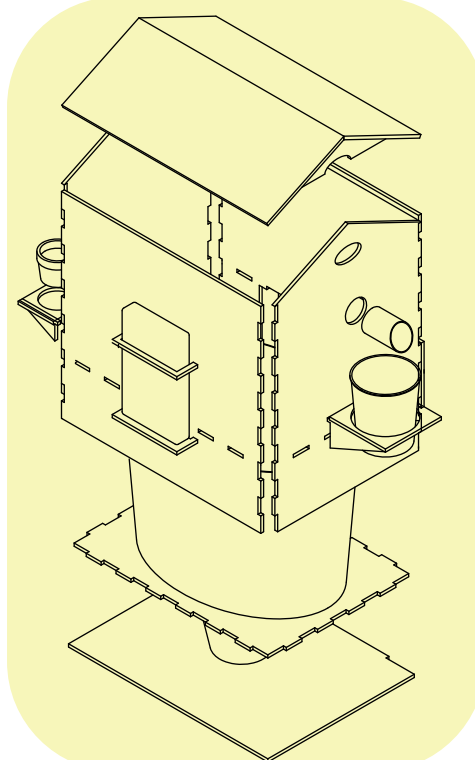

Bucket (closed & open)

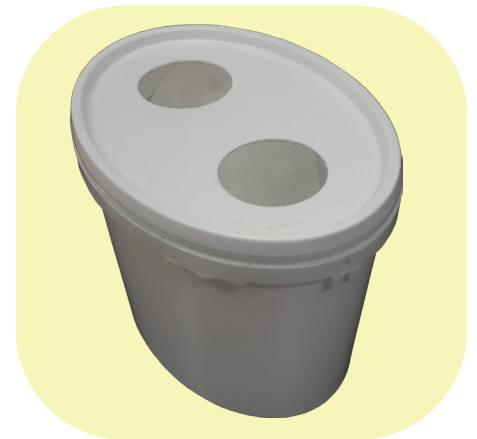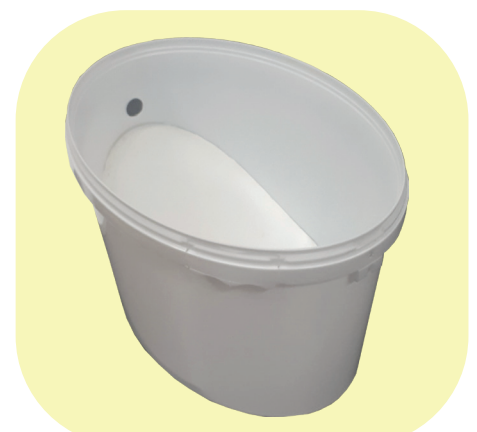

1

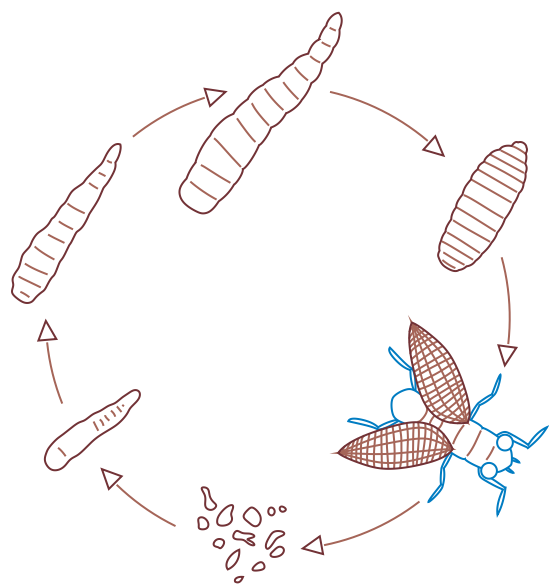

4

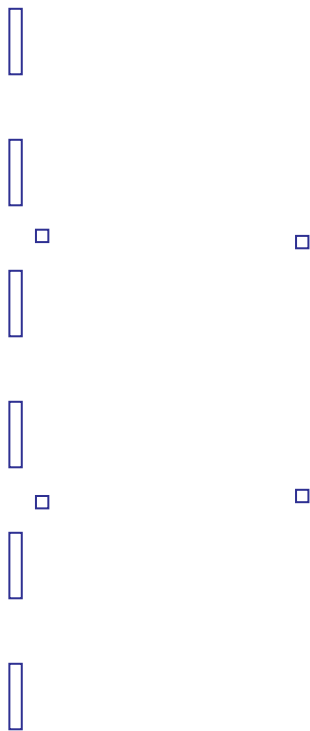

15

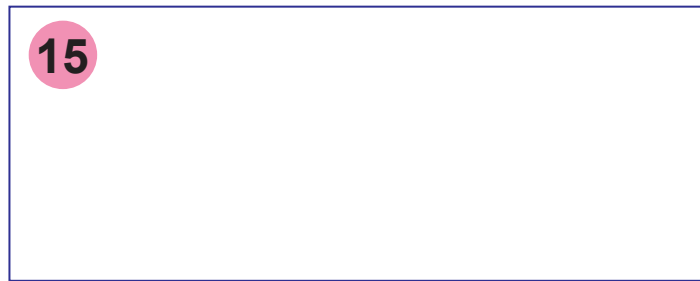

2

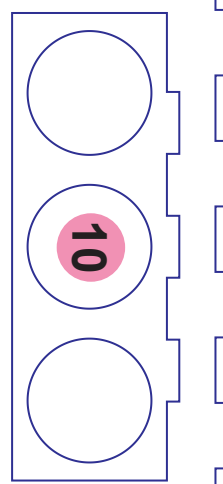

10

6.

6.

3

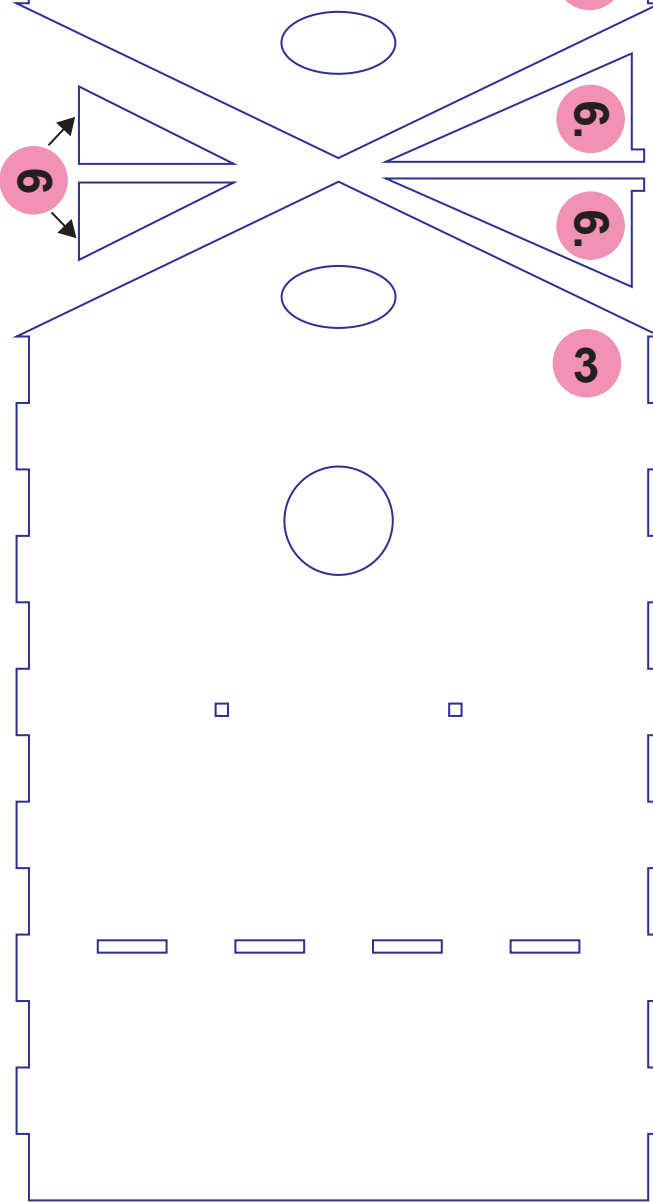

6

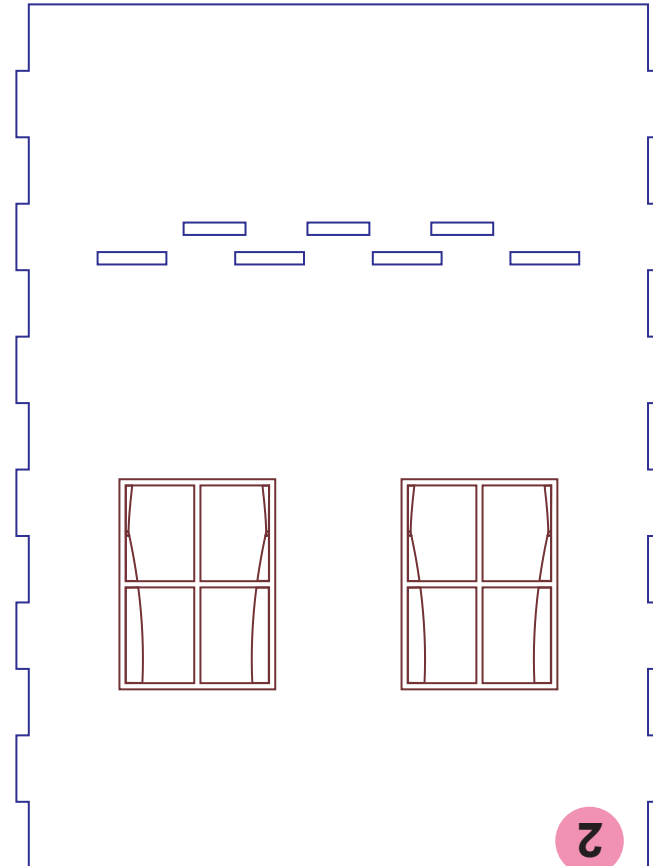

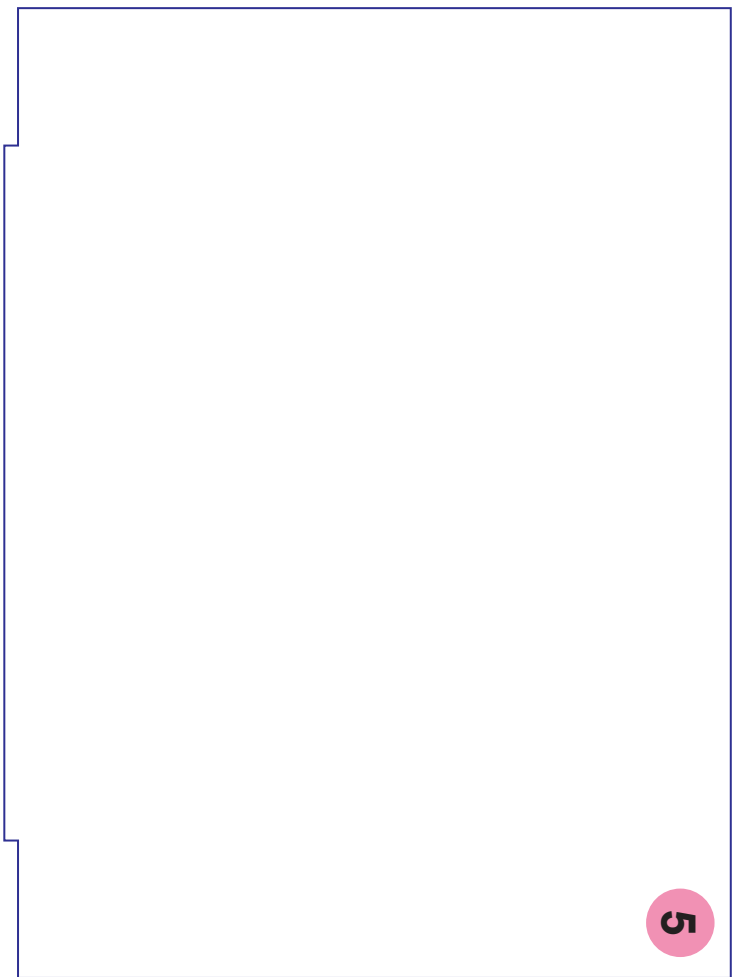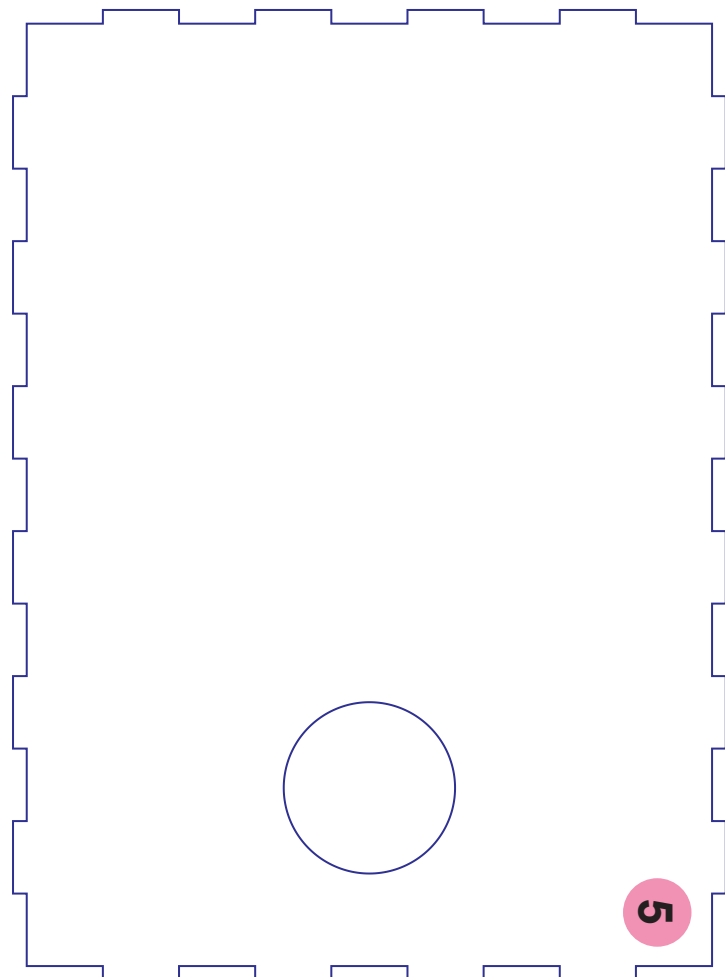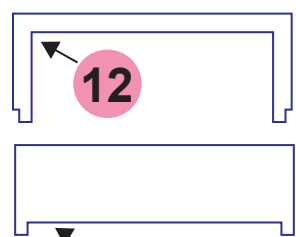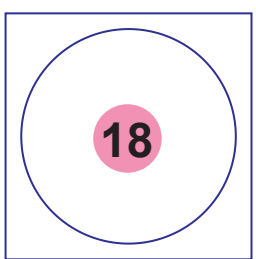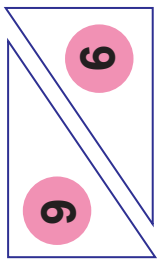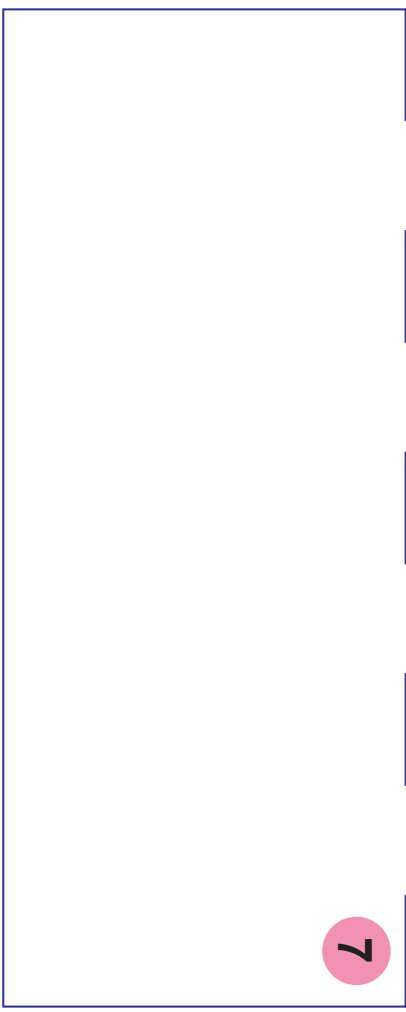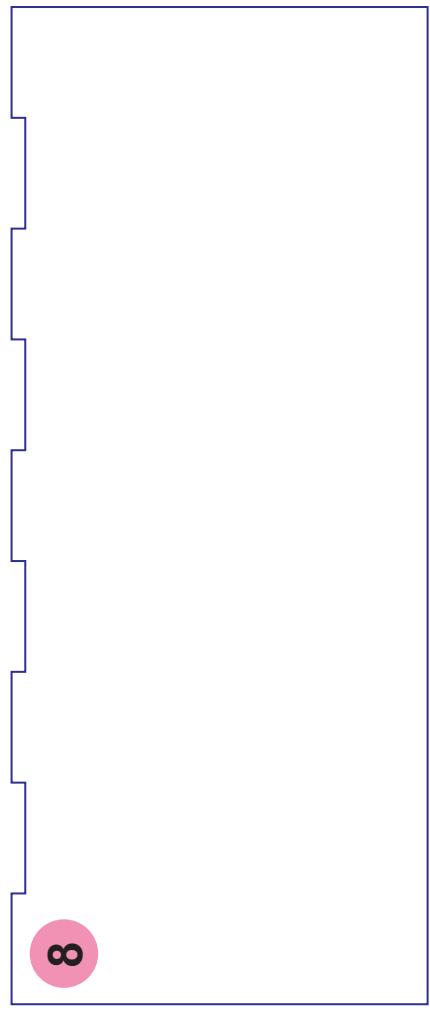

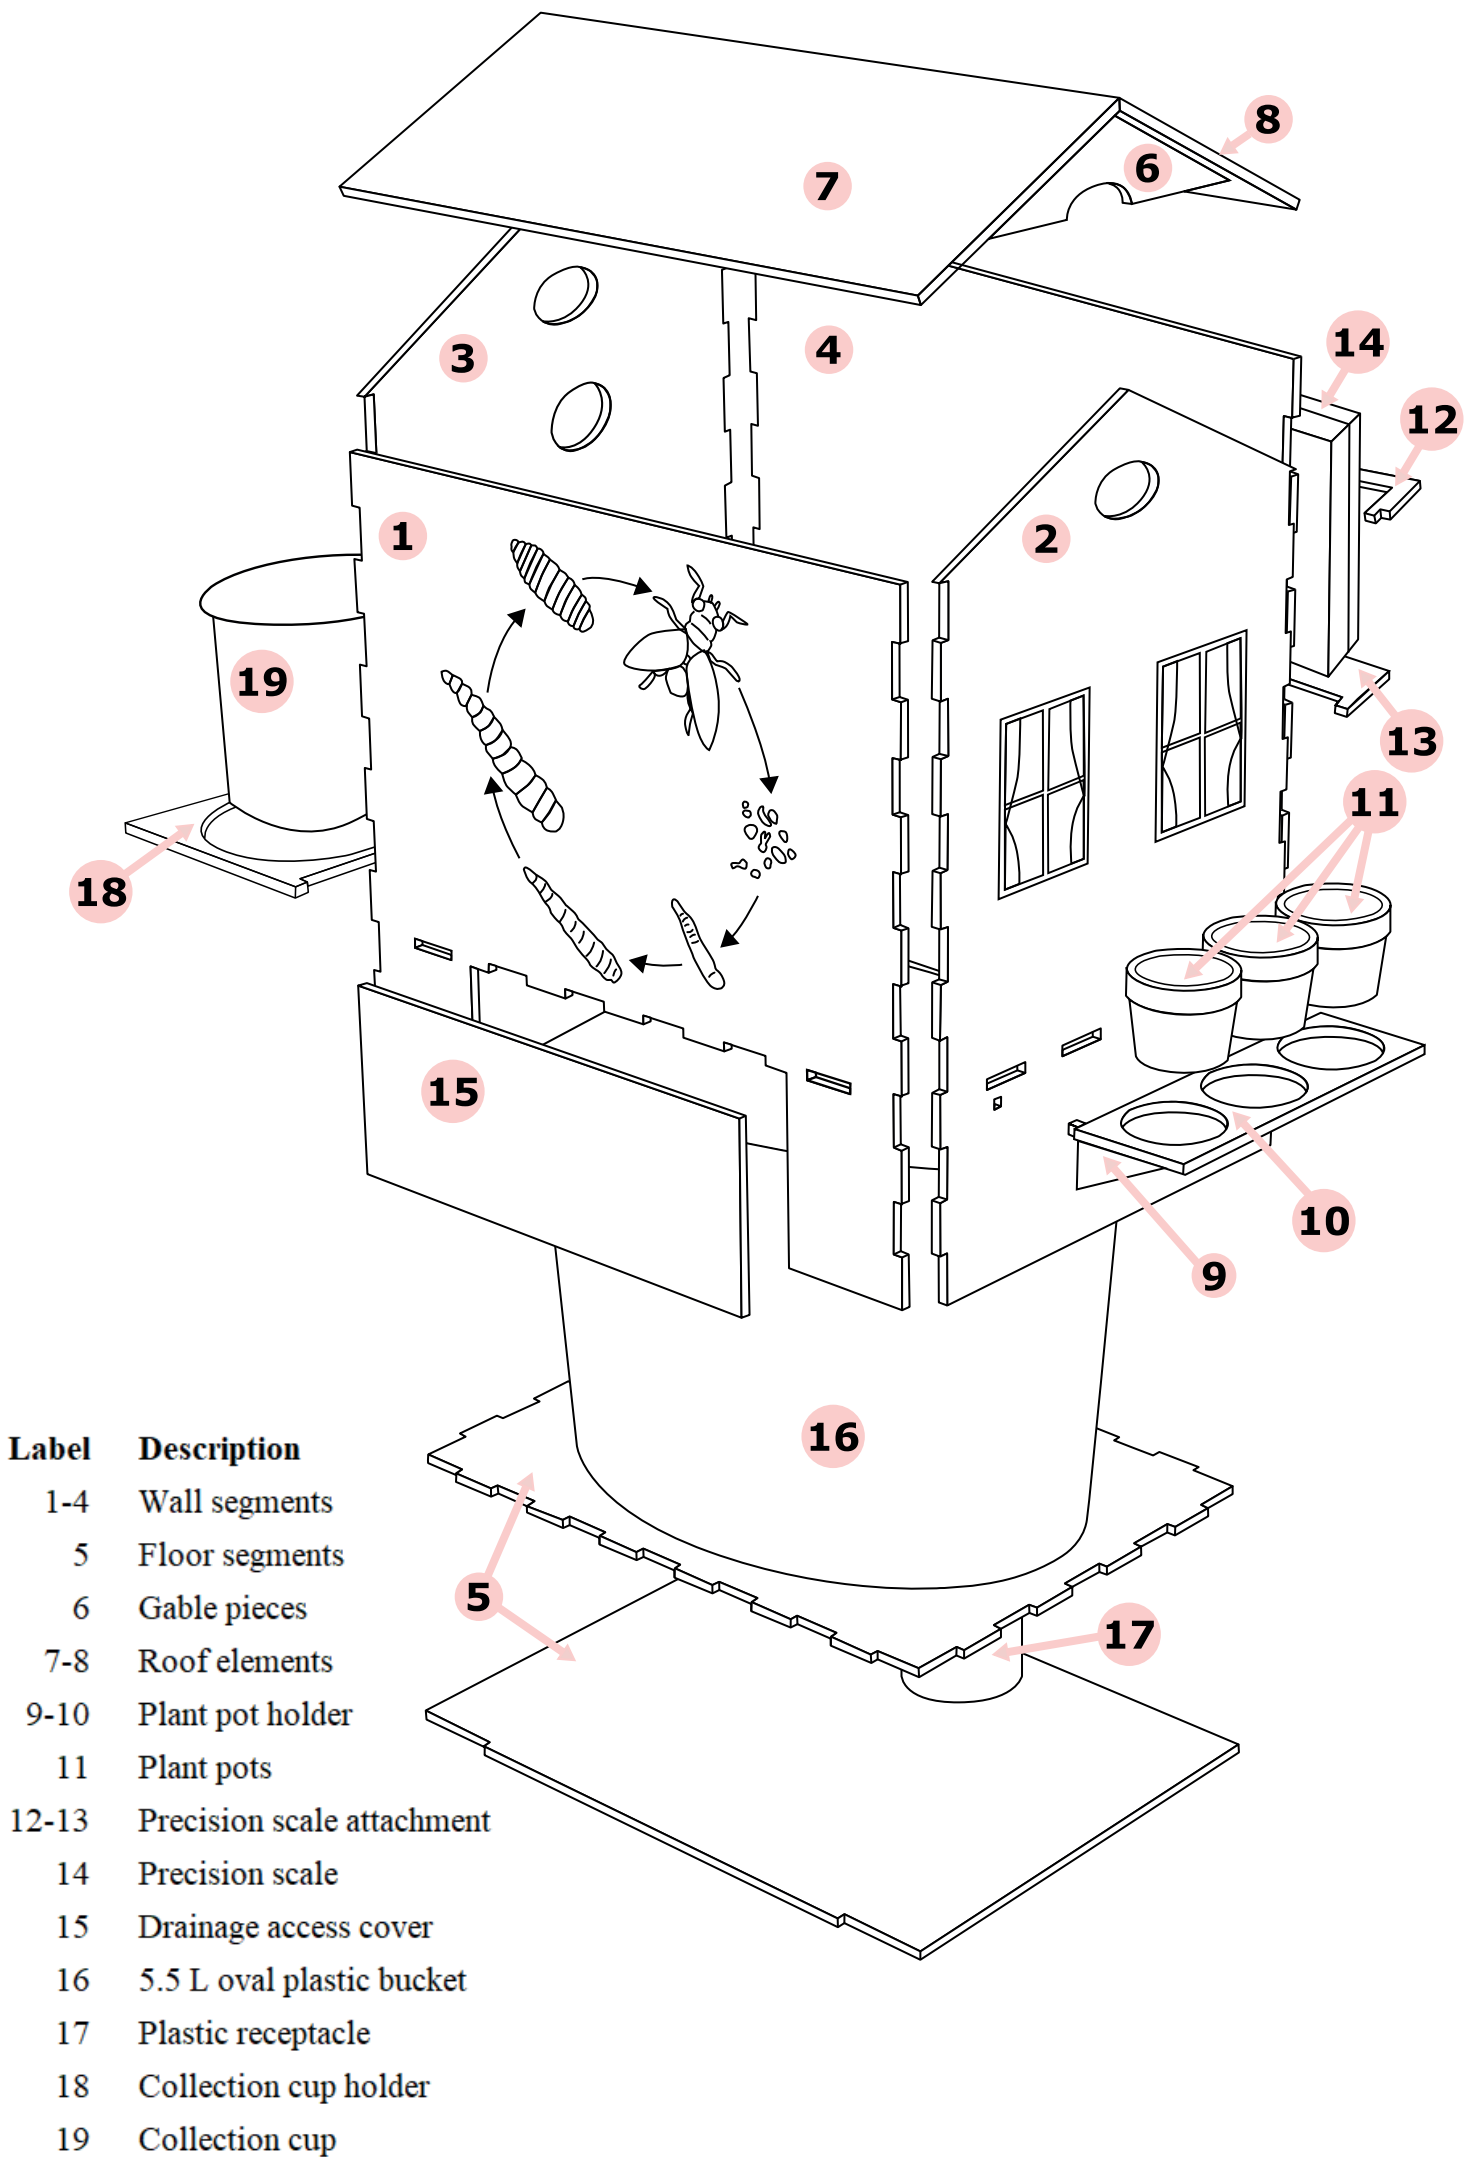

Supplement: s1 [file s1]
