# Supplementary material
Source: MDPI journal article supplement (https://www.mdpi.com/2071-1050/12/22/9574)
Supplement: s1 [file s1]

**To be done per feeding (3-4 times/week)**

- Add approx. **30-40 g of waste per day** to your container: document specific weight and type of waste
  - It is not necessary to feed every day, just multiply the amount for the respective days:  
 $1 \text{ day} = 30\text{-}40 \text{ g}$ ;  $2 \text{ days} = 60\text{-}80 \text{ g}$ ;  $3 \text{ days} = 90\text{-}120 \text{ g}$
- Documentation and weighting of larvae
- Document noticeable observations

**How to weight correctly:**

1. Put your precision scale on an **even surface** and **switch it on**
2. Check if the shown **unit is set as g** (gram)
  - a. This is indicated by the small “g” on the **upper edge** of the display
  - b. If something other than “g” is shown, repeatedly press **MODE** until “g” is selected
3. Check if the **display shows 0.00** (otherwise press **TARE** and check again)
4. **WEIGHT WASTE**: put the waste **separated by type** in the **middle of the scale** and **document the weight** as well as the **type of weighted waste** (see *Table 1*)

*Table 1 – Example for filling out the experimental protocol - waste*

| Day | Date       | Weight waste  | Type of waste  | Observations                                                                                                                                                                                                    |
|-----|------------|---------------|----------------|-----------------------------------------------------------------------------------------------------------------------------------------------------------------------------------------------------------------|
| 13  | 01.01.2020 | _____6____ g  | _Apple core_   | <ul style="list-style-type: none"> <li>• The larvae visibly grew compared to the last feeding</li> <li>• The colour of the waste turned brown</li> <li>• The larvae try to escape from the container</li> </ul> |
|     |            | _____12____ g | _Old bread_    |                                                                                                                                                                                                                 |
|     |            | _____10____ g | Lettuce leaves |                                                                                                                                                                                                                 |
|     |            | _____5____ g  | _Pasta_____    |                                                                                                                                                                                                                 |
|     |            | _____9____ g  | _Banana_____   |                                                                                                                                                                                                                 |
|     |            | _____g        | _____          |                                                                                                                                                                                                                 |

5. **WEIGHT LARVAE**: Carefully fish out **5 larvae** from the container using your **forceps**, put them in the **middle of the scale** and **document the weight** (see *Table 2*). Put the larvae **back into the container**.

*Table 2 – Example for filling out the experimental protocol - larvae*

| Day | Date       | Weight larvae                                  | Description of the larvae                                                            |
|-----|------------|------------------------------------------------|--------------------------------------------------------------------------------------|
| 13  | 01.01.2020 | 5 larvae weighted together :<br>____0.21____ g | The larvae are approximately 5 mm in length, light brown in color and slightly hairy |

6. **Carefully wipe the surface** of the scale with a wet tissue or similar.

**Important:** This is an experiment with biologically degradable material, therefore, mold can occur due to the natural rotting processes. This can for example happen, when too much waste was added and the larvae are overwhelmed with the degradation. High humidity in the container could also favor the growth of mold. By reducing the feeding amount and using drier wastes (e.g. bread, salad) you can counteract the mold formation.

## Six-legged Livestock

### Rearing Black Soldier Fly on Biowaste

**Problems? Questions? Contact us or drop by at our department!**

**Address:** Department of Microbiology, Technikerstraße 25d (Bauteil V, 1. Stock)

**Phone:** +43 512 507 51322 (Thomas Klammersteiner)

+43 512 507-51701 (Carina D. Heussler)

**Email:** [fromwastetofeed@outlook.com](mailto:fromwastetofeed@outlook.com)

**Website:** <https://www.fromwastetofeed.wordpress.com>

**Your data**

First name: \_\_\_\_\_

Last name: \_\_\_\_\_

Age: \_\_\_\_\_

City: \_\_\_\_\_

Phone: \_\_\_\_\_

Mail: \_\_\_\_\_

**Your experimental environment**

Start of experiment: \_\_\_\_\_

Initial weight of larvae (total): \_\_\_\_\_

Where will the house be set-up: \_\_\_\_\_

Ambient temperature: \_\_\_\_\_

Termination of experiment: \_\_\_\_\_

Please contact us after termination of the experiment!

Experimental protocol – Week 1 - Waste

| Day | Date | Weight waste | Type of waste | Observations |
|-----|------|--------------|---------------|--------------|
| 1   |      | ----- g      | -----         |              |
|     |      | ----- g      | -----         |              |
|     |      | ----- g      | -----         |              |
|     |      | ----- g      | -----         |              |
|     |      | ----- g      | -----         |              |
| 2   |      | ----- g      | -----         |              |
|     |      | ----- g      | -----         |              |
|     |      | ----- g      | -----         |              |
|     |      | ----- g      | -----         |              |
|     |      | ----- g      | -----         |              |
| 3   |      | ----- g      | -----         |              |
|     |      | ----- g      | -----         |              |
|     |      | ----- g      | -----         |              |
|     |      | ----- g      | -----         |              |
|     |      | ----- g      | -----         |              |
| 4   |      | ----- g      | -----         |              |
|     |      | ----- g      | -----         |              |
|     |      | ----- g      | -----         |              |
|     |      | ----- g      | -----         |              |
|     |      | ----- g      | -----         |              |
| 5   |      | ----- g      | -----         |              |
|     |      | ----- g      | -----         |              |
|     |      | ----- g      | -----         |              |
|     |      | ----- g      | -----         |              |
|     |      | ----- g      | -----         |              |
| 6   |      | ----- g      | -----         |              |
|     |      | ----- g      | -----         |              |
|     |      | ----- g      | -----         |              |
|     |      | ----- g      | -----         |              |
|     |      | ----- g      | -----         |              |
| 7   |      | ----- g      | -----         |              |
|     |      | ----- g      | -----         |              |
|     |      | ----- g      | -----         |              |
|     |      | ----- g      | -----         |              |
|     |      | ----- g      | -----         |              |

Experimental protocol – Week 3 - Larvae

| Day | Date | Weight of larvae                       | Description of larvae |
|-----|------|----------------------------------------|-----------------------|
| 15  |      | 5 larvae weighted<br>together: ----- g |                       |
| 16  |      | 5 larvae weighted<br>together: ----- g |                       |
| 17  |      | 5 larvae weighted<br>together: ----- g |                       |
| 18  |      | 5 larvae weighted<br>together: ----- g |                       |
| 19  |      | 5 larvae weighted<br>together: ----- g |                       |
| 20  |      | 5 larvae weighted<br>together: ----- g |                       |
| 21  |      | 5 larvae weighted<br>together: ----- g |                       |

Experimental protocol – Week 3 - Waste

| Day | Date | Weight waste | Type of waste | Observations |
|-----|------|--------------|---------------|--------------|
| 15  |      | -----g       | -----         |              |
|     |      | -----g       | -----         |              |
| 16  |      | -----g       | -----         |              |
|     |      | -----g       | -----         |              |
| 17  |      | -----g       | -----         |              |
|     |      | -----g       | -----         |              |
| 18  |      | -----g       | -----         |              |
|     |      | -----g       | -----         |              |
| 19  |      | -----g       | -----         |              |
|     |      | -----g       | -----         |              |
| 20  |      | -----g       | -----         |              |
|     |      | -----g       | -----         |              |
| 21  |      | -----g       | -----         |              |
|     |      | -----g       | -----         |              |

Experimental protocol – Week 1 - Larvae

| Day | Date | Weight of larvae                       | Description of larvae |
|-----|------|----------------------------------------|-----------------------|
| 1   |      | 5 larvae weighted<br>together: ----- g |                       |
| 2   |      | 5 larvae weighted<br>together: ----- g |                       |
| 3   |      | 5 larvae weighted<br>together: ----- g |                       |
| 4   |      | 5 larvae weighted<br>together: ----- g |                       |
| 5   |      | 5 larvae weighted<br>together: ----- g |                       |
| 6   |      | 5 larvae weighted<br>together: ----- g |                       |
| 7   |      | 5 larvae weighted<br>together: ----- g |                       |

Experimental protocol – Week 2 - Waste

| Day | Date | Weight waste | Type of waste | Observations |
|-----|------|--------------|---------------|--------------|
| 8   |      | ----- g      | -----         |              |
|     |      | ----- g      | -----         |              |
|     |      | ----- g      | -----         |              |
|     |      | ----- g      | -----         |              |
|     |      | ----- g      | -----         |              |
| 9   |      | ----- g      | -----         |              |
|     |      | ----- g      | -----         |              |
|     |      | ----- g      | -----         |              |
|     |      | ----- g      | -----         |              |
|     |      | ----- g      | -----         |              |
| 10  |      | ----- g      | -----         |              |
|     |      | ----- g      | -----         |              |
|     |      | ----- g      | -----         |              |
|     |      | ----- g      | -----         |              |
|     |      | ----- g      | -----         |              |
| 11  |      | ----- g      | -----         |              |
|     |      | ----- g      | -----         |              |
|     |      | ----- g      | -----         |              |
|     |      | ----- g      | -----         |              |
|     |      | ----- g      | -----         |              |
| 12  |      | ----- g      | -----         |              |
|     |      | ----- g      | -----         |              |
|     |      | ----- g      | -----         |              |
|     |      | ----- g      | -----         |              |
|     |      | ----- g      | -----         |              |
| 13  |      | ----- g      | -----         |              |
|     |      | ----- g      | -----         |              |
|     |      | ----- g      | -----         |              |
|     |      | ----- g      | -----         |              |
|     |      | ----- g      | -----         |              |
| 14  |      | ----- g      | -----         |              |
|     |      | ----- g      | -----         |              |
|     |      | ----- g      | -----         |              |
|     |      | ----- g      | -----         |              |
|     |      | ----- g      | -----         |              |

Experimental protocol – Week 2 - Larvae

| Day | Date | Weight of larvae                       | Description of larvae |
|-----|------|----------------------------------------|-----------------------|
| 8   |      | 5 larvae weighted<br>together: ----- g |                       |
|     |      |                                        |                       |
| 9   |      | 5 larvae weighted<br>together: ----- g |                       |
|     |      |                                        |                       |
| 10  |      | 5 larvae weighted<br>together: ----- g |                       |
|     |      |                                        |                       |
| 11  |      | 5 larvae weighted<br>together: ----- g |                       |
|     |      |                                        |                       |
| 12  |      | 5 larvae weighted<br>together: ----- g |                       |
|     |      |                                        |                       |
| 13  |      | 5 larvae weighted<br>together: ----- g |                       |
|     |      |                                        |                       |
| 14  |      | 5 larvae weighted<br>together: ----- g |                       |
|     |      |                                        |                       |
