# Supplementary material
Source: MDPI journal article supplement (https://www.mdpi.com/2071-1050/12/22/9574)
Supplement: s1 [file s1]

## QUESTIONNAIRE 1:

1. What feelings does the work with the BSF convey? (*Multiple answers possible*)
  - ☐ Fear
  - ☐ Scepticism
  - ☐ Indifference
  - ☐ Curiosity
  - ☐ Excitement
2. For which applications could insects be used? (*Multiple answers possible*)
  - ☐ Production of honey
  - ☐ Production of silk
  - ☐ As animal feed
  - ☐ As human food
  - ☐ Others
3. What is your opinion on insects as animal feed? (*Multiple answers possible*)
  - ☐ Disgusting
  - ☐ Good
  - ☐ Never thought about it
4. Can you imagine eating insects and products made thereof? (*Multiple answers possible*)
  - ☐ Yes
  - ☐ No
  - ☐ Depends on the insect

## QUESTIONNAIRE 2:

1. What feelings does the work with the BSF convey? (*Multiple answers possible*)
  - ☐ Fear
  - ☐ Scepticism
  - ☐ Indifference
  - ☐ Curiosity
  - ☐ Excitement
2. For which applications could insects be used? (*Multiple answers possible*)
  - ☐ Production of honey
  - ☐ Production of silk
  - ☐ As animal feed
  - ☐ As human food
  - ☐ Others
3. What is your opinion on insects as animal feed? (*Multiple answers possible*)
  - ☐ Disgusting
  - ☐ Good
  - ☐ Never thought about it
4. Can you imagine eating insects and products made thereof? (*Multiple answers possible*)
  - ☐ Yes
  - ☐ No
  - ☐ Depends on the insect
5. What should happen with the larvae grown in the experiment? (*Multiple answers possible*)
  - ☐ They should be kept alive to repeat the experiment
  - ☐ They should be kept alive to fulfil their natural life cycle
  - ☐ They should be used as animal feed
  - ☐ We should be consumed as food
  - ☐ They should be frozen
6. Did you speak about the use of insects outside of the workshop with people you know?  
(*No multiple answers possible*)
  - ☐ No
  - ☐ Yes

### QUESTIONNAIRE TEACHERS:

1. The workshop... (*No multiple answers possible*)

- ☐ ...was a great success.
- ☐ ...worked as expected.
- ☐ ...did not work as expected.
- ☐ ...was not successful.

2. What did you especially like?

3. What would you change? How would you optimize the workshop?

4. Could the workshop be implemented in the subject "Biology"?

5. What do you think were the aims of this workshop? Were these aims reached?

6. What positive experiences did the pupils take away with them?

7. Additional aspects, not covered by questions.
